# Supplementary material for: Molecular self-assemblies of a π-conjugated redox-active bipyridinium cation with magnetic dimetallic oxalate-bridged trimeric clusters
Source: Royal Society of Chemistry journal article supplement (doi:10.1039/b512695a), 2005-12-15
Supplement: b512695a.pdf [file b512695a.pdf]

## Supporting information

### Molecular self-assemblies of a $\pi$ -conjugated redox-active bipyridinium cation with magnetic dimetallic oxalate-bridged trimeric clusters

**Yan-Qiong Sun, Jie Zhang\* and Guo-Yu Yang**

*State Key Laboratory of Structural Chemistry, Fujian Institute of Research on the Structure of Matter, Chinese Academy of Sciences, Fujian, Fuzhou, 350002, China.*

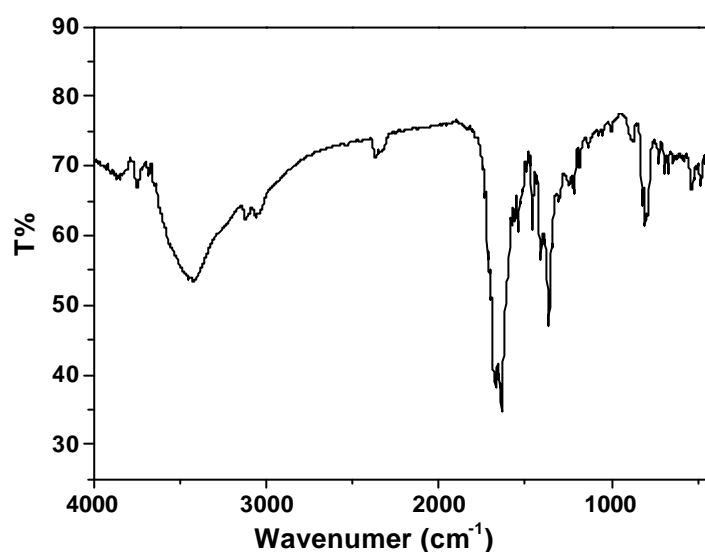

**Fig. 1S** IR spectrum of compound 1  $(\text{Bpyph})_2\{\text{Mn}^{\text{II}}(\text{H}_2\text{O})_2[\text{Fe}^{\text{III}}(\text{C}_2\text{O}_4)_3]_2\}\cdot 12.5\text{H}_2\text{O}$

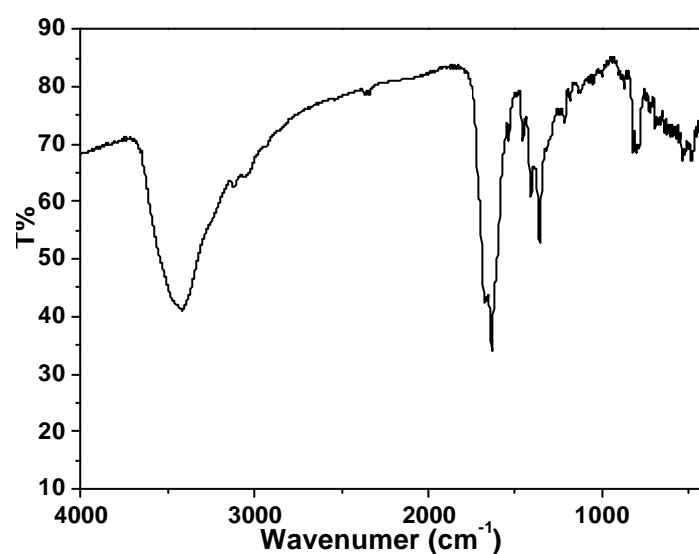

**Fig. 2S** IR spectrum of compound 2,  $(\text{Bpyph})_2\{\text{Co}^{\text{II}}(\text{H}_2\text{O})_2[\text{Fe}^{\text{III}}(\text{C}_2\text{O}_4)_3]_2\}\cdot 12.5\text{H}_2\text{O}$

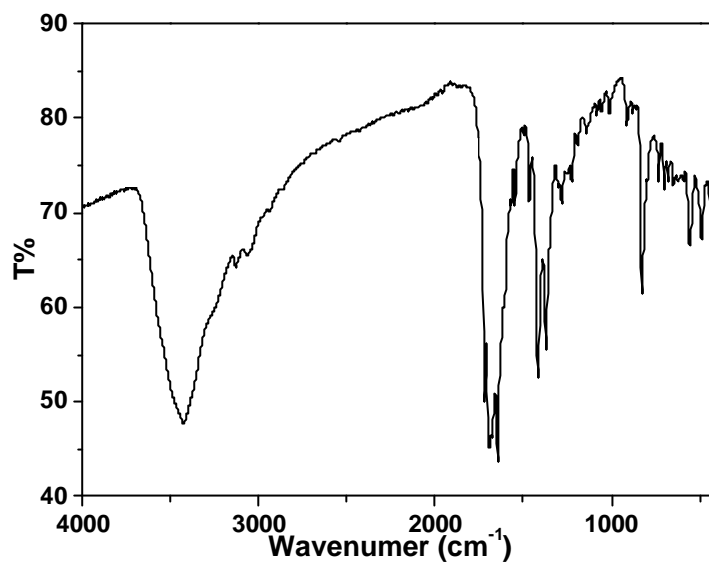

Fig. 3S IR spectrum of compound 3,  $(\text{Bpyph})_2\{\text{Mn}^{\text{II}}(\text{H}_2\text{O})_2[\text{Cr}^{\text{III}}(\text{C}_2\text{O}_4)_3]_2\}\cdot 12.5\text{H}_2\text{O}$

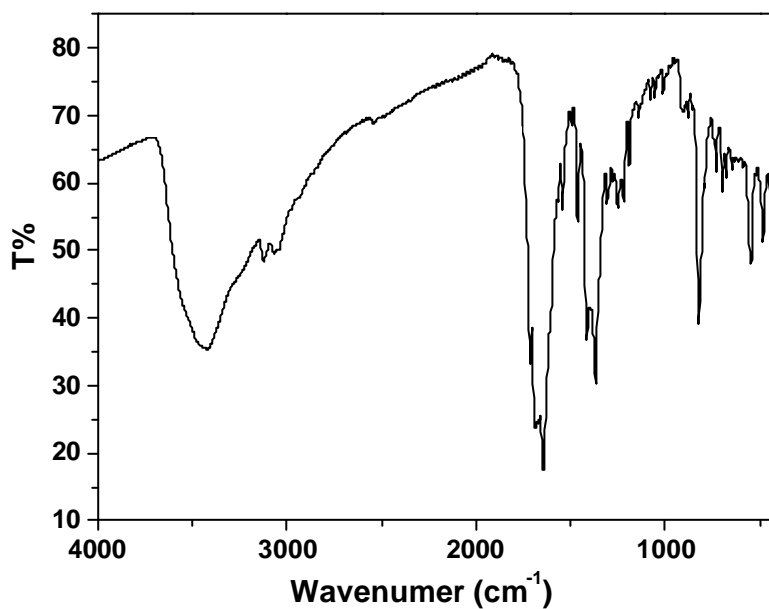

Fig. 4S IR spectrum of compound 4,  $(\text{Bpyph})_2\{\text{Co}^{\text{II}}(\text{H}_2\text{O})_2[\text{Cr}^{\text{III}}(\text{C}_2\text{O}_4)_3]_2\}\cdot 12.5\text{H}_2\text{O}$

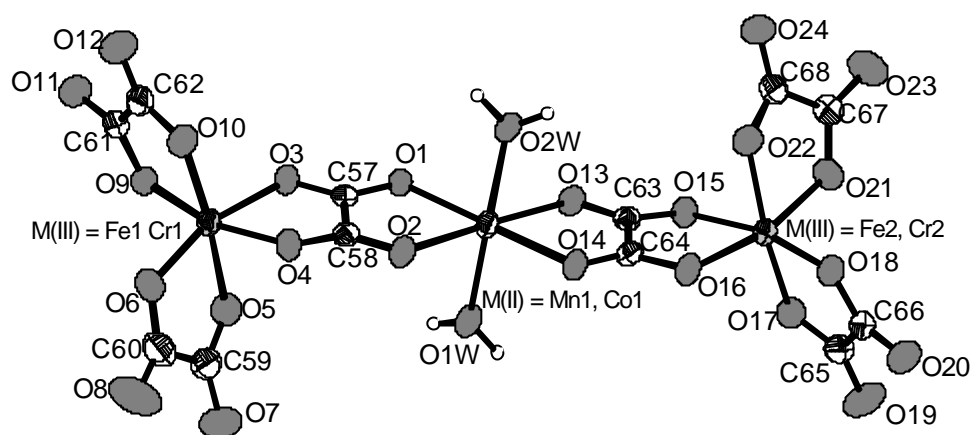

**Fig. 5S** Different chirality of the  $[\text{Fe}(\text{ox})_3]^{3-}$  unit in compound **1**,  $(\text{Bpyph})_2\{\text{Mn}^{\text{II}}(\text{H}_2\text{O})_2[\text{Fe}^{\text{III}}(\text{C}_2\text{O}_4)_3]_2\} \cdot 12.5\text{H}_2\text{O}$

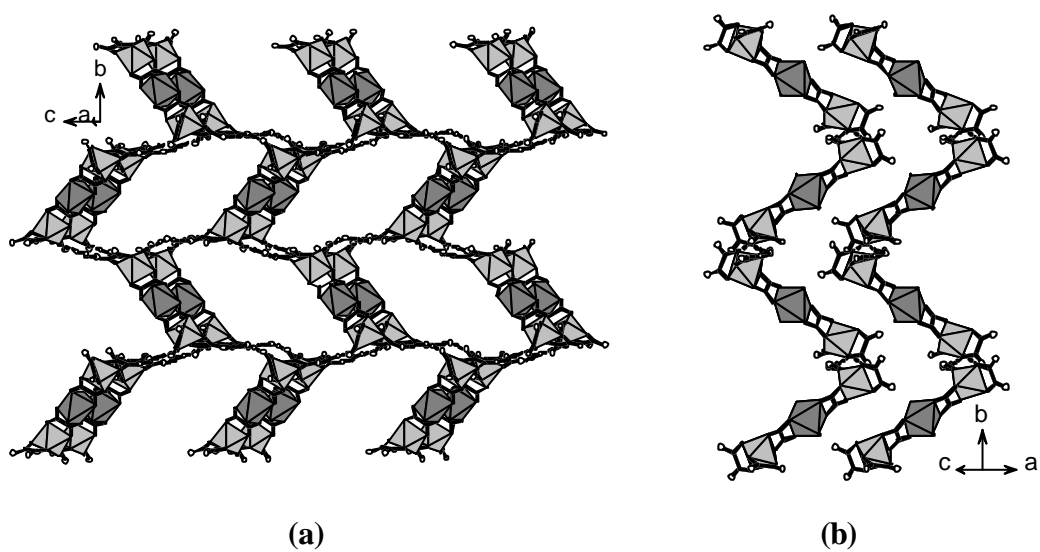

**Fig. 6S** Stacking structure of 2-D hydrogen bonding network in compound **1** (a) viewed close to  $a$ -axis, (b) viewed along  $[101]$  direction.

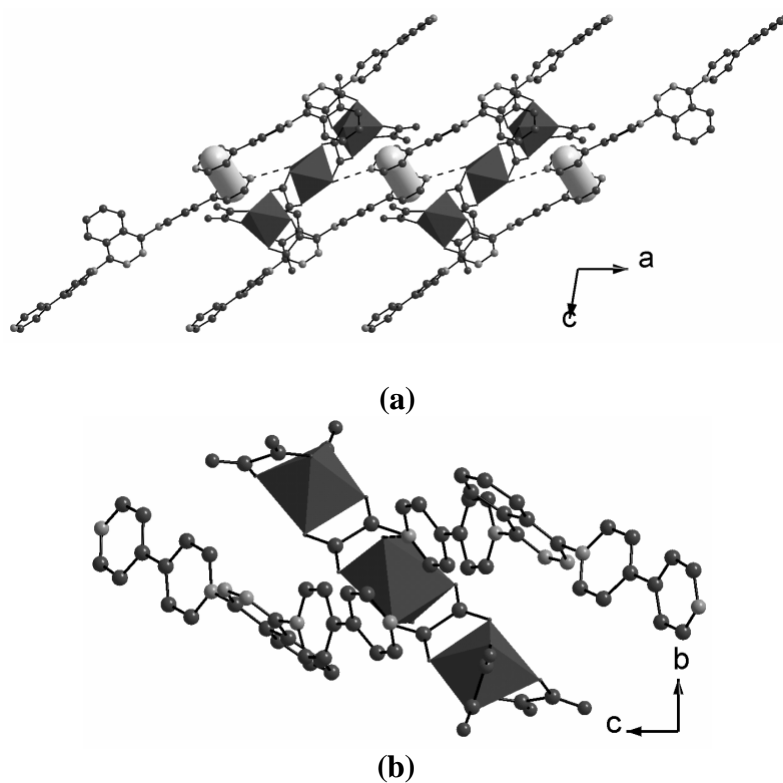

**Fig. 7S** View of the infinite ribbons built from alternating Bpyph<sup>2+</sup> cations and dimetallic trimers through hydrogen bonding and  $\pi$ - $\pi$  stacking interactions along  $b$ -axis (a) and  $a$ -axis (b) direction. All H atoms are omitted for clarity. The black dashed lines denote hydrogen bonds, and the light grey shadows in (a) represent  $\pi$ - $\pi$  interactions.

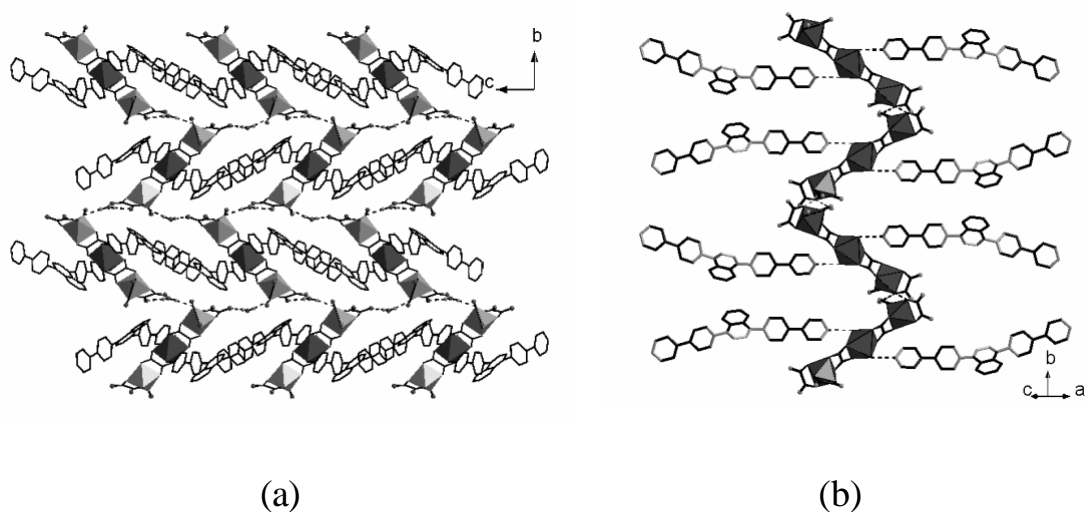

**Fig. 8S** A perspective view of 2-D hydrogen bonded metal-oxalate network with BPyph<sup>2+</sup> cations attached. (a) viewed along  $a$ -axis, (b) viewed along [101] direction.

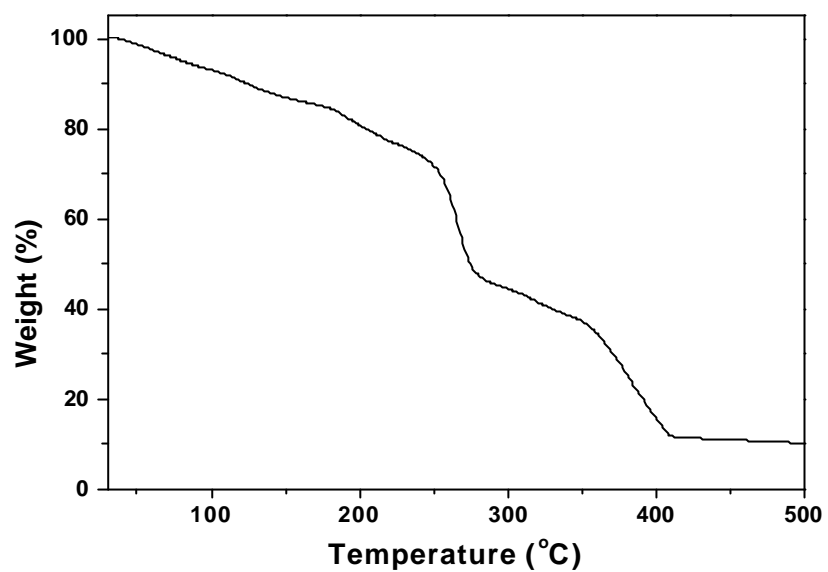

**Fig. 9S** The TGA plot for compound 1,  $(\text{Bpyph})_2\{\text{Mn}(\text{H}_2\text{O})_2[\text{Fe}(\text{C}_2\text{O}_4)_3]_2\}\cdot 12.5\text{H}_2\text{O}$

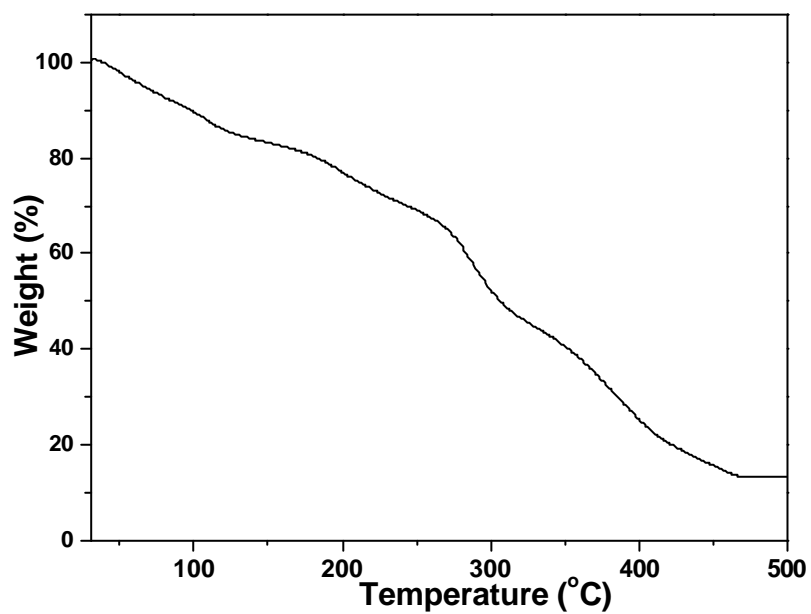

**Fig. 10S** The TGA plot for compound 2,  $(\text{Bpyph})_2\{\text{Co}(\text{H}_2\text{O})_2[\text{Fe}(\text{C}_2\text{O}_4)_3]_2\}\cdot 12.5\text{H}_2\text{O}$

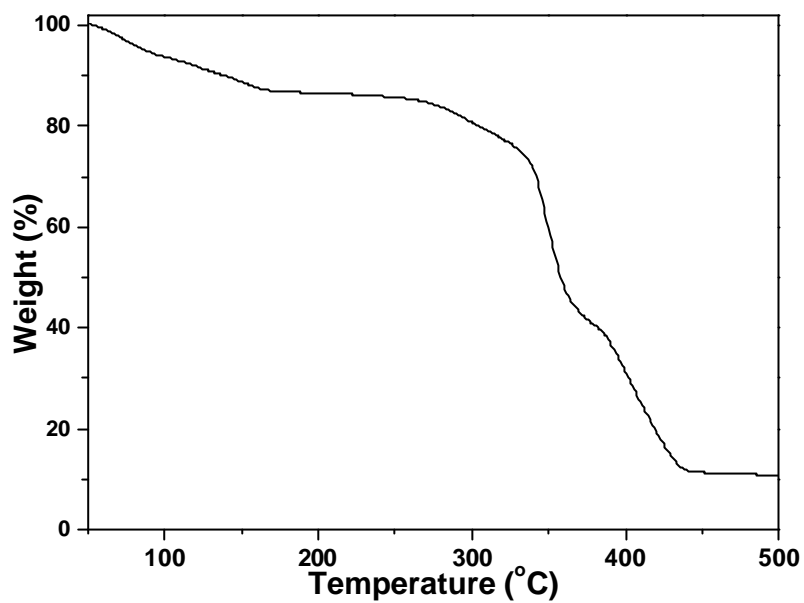

**Fig.11S** The TGA plot for compound 3,  $(\text{Bpyph})_2\{\text{Mn}(\text{H}_2\text{O})_2[\text{Cr}(\text{C}_2\text{O}_4)_3]_2\}\cdot 12.5\text{H}_2\text{O}$

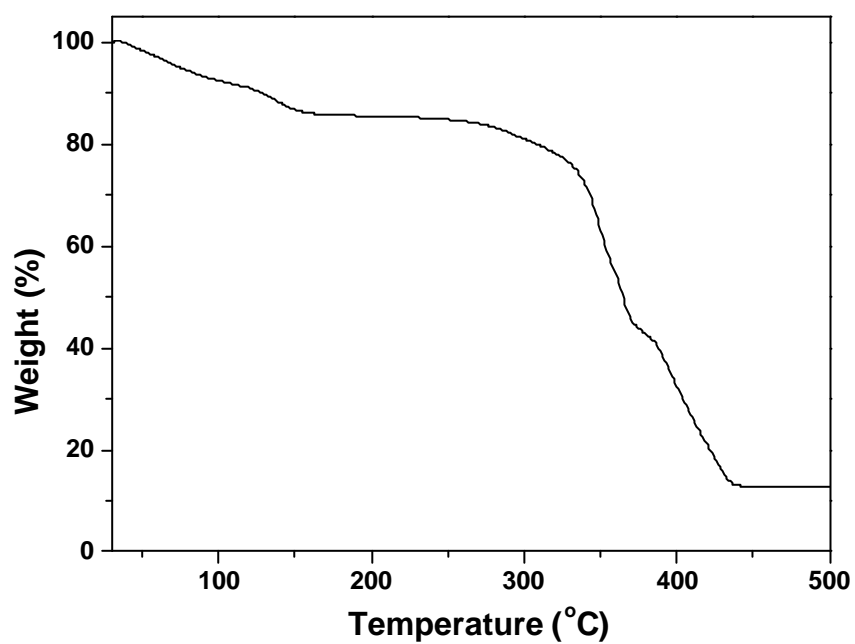

**Fig. 12S** The TGA plot for compound 4,  $(\text{Bpyph})_2\{\text{Co}(\text{H}_2\text{O})_2[\text{Cr}(\text{C}_2\text{O}_4)_3]_2\}\cdot 12.5\text{H}_2\text{O}$

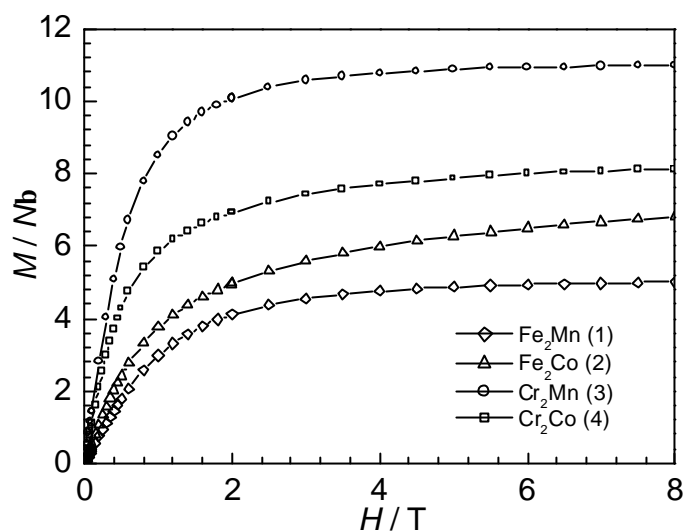

**Fig. 13S** The field dependence of the magnetization at 2 K for the  $\text{Fe}_2\text{M}$  and  $\text{Cr}_2\text{M}$  series. The solid line is a guide for the eye.

**Table 1** Selected bond angles of compounds 1-4

|                   |            |                   |            |                   |           |
|-------------------|------------|-------------------|------------|-------------------|-----------|
| <b>Compound 1</b> |            |                   |            |                   |           |
| O(3)-Fe(1)-O(4)   | 80.18(8)   | O(15)-Fe(2)-O(16) | 80.38(8)   | O(1)-Mn(1)-O(2)   | 77.16(7)  |
| O(3)-Fe(1)-O(5)   | 87.98(9)   | O(15)-Fe(2)-O(17) | 91.23(9)   | O(1)-Mn(1)-O(2W)  | 91.56(8)  |
| O(3)-Fe(1)-O(9)   | 88.62(8)   | O(15)-Fe(2)-O(21) | 92.71(9)   | O(1)-Mn(1)-O(13)  | 102.63(8) |
| O(3)-Fe(1)-O(10)  | 98.11(9)   | O(15)-Fe(2)-O(22) | 88.29(9)   | O(2)-Mn(1)-O(14)  | 102.99(8) |
| O(4)-Fe(1)-O(5)   | 89.65(9)   | O(16)-Fe(2)-O(17) | 101.54(9)  | O(13)-Mn(1)-O(14) | 77.26(8)  |
| O(4)-Fe(1)-O(6)   | 89.63(9)   | O(16)-Fe(2)-O(18) | 89.36(9)   | O(1W)-Mn(1)-O(1)  | 89.17(9)  |
| O(4)-Fe(1)-O(10)  | 92.84(9)   | O(16)-Fe(2)-O(22) | 87.42(9)   | O(1W)-Mn(1)-O(2)  | 85.47(8)  |
| O(5)-Fe(1)-O(6)   | 80.63(9)   | O(17)-Fe(2)-O(18) | 82.41(10)  | O(1W)-Mn(1)-O(13) | 92.39(8)  |
| O(5)-Fe(1)-O(9)   | 97.56(9)   | O(17)-Fe(2)-O(21) | 90.34(9)   | O(1W)-Mn(1)-O(14) | 91.79(9)  |
| O(6)-Fe(1)-O(9)   | 102.79(9)  | O(18)-Fe(2)-O(21) | 99.04(10)  | O(2W)-Mn(1)-O(2)  | 95.50(8)  |
| O(6)-Fe(1)-O(10)  | 93.63(9)   | O(18)-Fe(2)-O(22) | 99.85(10)  | O(2W)-Mn(1)-O(13) | 86.64(8)  |
| O(9)-Fe(1)-O(10)  | 81.18(9)   | O(21)-Fe(2)-O(22) | 80.52(9)   | O(2W)-Mn(1)-O(14) | 87.47(9)  |
| <b>Compound 2</b> |            |                   |            |                   |           |
| O(3)-Fe(1)-O(4)   | 80.10(10)  | O(15)-Fe(2)-O(16) | 80.07(10)  | O(1)-Co(1)-O(2)   | 79.83(9)  |
| O(3)-Fe(1)-O(5)   | 88.22(11)  | O(15)-Fe(2)-O(17) | 91.38(11)  | O(1)-Co(1)-O(2W)  | 91.18(9)  |
| O(3)-Fe(1)-O(9)   | 88.75(10)  | O(15)-Fe(2)-O(21) | 92.61(11)  | O(1)-Co(1)-O(13)  | 100.13(9) |
| O(3)-Fe(1)-O(10)  | 98.84(11)  | O(15)-Fe(2)-O(22) | 88.12(11)  | O(2)-Co(1)-O(14)  | 100.04(9) |
| O(4)-Fe(1)-O(5)   | 89.79(11)  | O(16)-Fe(2)-O(17) | 101.55(11) | O(13)-Co(1)-O(14) | 80.02(9)  |
| O(4)-Fe(1)-O(6)   | 90.09(10)  | O(16)-Fe(2)-O(18) | 89.88(11)  | O(1W)-Co(1)-O(1)  | 89.04(11) |
| O(4)-Fe(1)-O(10)  | 92.82(11)  | O(16)-Fe(2)-O(22) | 87.95(11)  | O(1W)-Co(1)-O(2)  | 86.77(10) |
| O(5)-Fe(1)-O(6)   | 80.63(11)  | O(17)-Fe(2)-O(18) | 82.59(12)  | O(1W)-Co(1)-O(13) | 91.66(10) |
| O(5)-Fe(1)-O(9)   | 97.66(11)  | O(17)-Fe(2)-O(21) | 89.95(11)  | O(1W)-Co(1)-O(14) | 91.88(10) |
| O(6)-Fe(1)-O(9)   | 102.19(11) | O(18)-Fe(2)-O(21) | 98.81(12)  | O(2W)-Co(1)-O(2)  | 93.90(10) |
| O(6)-Fe(1)-O(10)  | 92.64(12)  | O(18)-Fe(2)-O(22) | 99.75(12)  | O(2W)-Co(1)-O(13) | 87.67(10) |
| O(9)-Fe(1)-O(10)  | 81.15(11)  | O(21)-Fe(2)-O(22) | 80.35(12)  | O(2W)-Co(1)-O(14) | 87.90(10) |
| <b>Compound 3</b> |            |                   |            |                   |           |
| O(3)-Cr(1)-O(4)   | 83.1(3)    | O(15)-Cr(2)-O(16) | 82.4(4)    | O(1)-Mn(1)-O(2)   | 75.7(3)   |
| O(3)-Cr(1)-O(5)   | 91.5(4)    | O(15)-Cr(2)-O(17) | 93.7(4)    | O(1)-Mn(1)-O(2W)  | 90.2(3)   |
| O(3)-Cr(1)-O(9)   | 91.2(4)    | O(15)-Cr(2)-O(21) | 94.6(4)    | O(1)-Mn(1)-O(13)  | 102.1(3)  |
| O(3)-Cr(1)-O(10)  | 93.1(4)    | O(15)-Cr(2)-O(22) | 89.7(4)    | O(2)-Mn(1)-O(14)  | 104.5(3)  |

|                   |           |                   |           |                   |            |
|-------------------|-----------|-------------------|-----------|-------------------|------------|
| O(4)-Cr(1)-O(5)   | 87.6(4)   | O(16)-Cr(2)-O(17) | 95.1(4)   | O(13)-Mn(1)-O(14) | 77.7(3)    |
| O(4)-Cr(1)-O(6)   | 89.0(3)   | O(16)-Cr(2)-O(18) | 87.9(4)   | O(1W)-Mn(1)-O(1)  | 88.7(4)    |
| O(4)-Cr(1)-O(10)  | 93.8(4)   | O(16)-Cr(2)-O(22) | 87.9(4)   | O(1W)-Mn(1)-O(2)  | 86.5(4)    |
| O(5)-Cr(1)-O(6)   | 81.0(4)   | O(17)-Cr(2)-O(18) | 82.2(4)   | O(1W)-Mn(1)-O(13) | 90.8(4)    |
| O(5)-Cr(1)-O(9)   | 96.0(4)   | O(17)-Cr(2)-O(21) | 90.9(4)   | O(1W)-Mn(1)-O(14) | 92.2(3)    |
| O(6)-Cr(1)-O(9)   | 97.1(4)   | O(18)-Cr(2)-O(21) | 95.5(5)   | O(2W)-Mn(1)-O(2)  | 97.5(3)    |
| O(6)-Cr(1)-O(10)  | 94.7(3)   | O(18)-Cr(2)-O(22) | 94.9(4)   | O(2W)-Mn(1)-O(13) | 85.1(4)    |
| O(9)-Cr(1)-O(10)  | 82.3(4)   | O(21)-Cr(2)-O(22) | 86.3(5)   | O(2W)-Mn(1)-O(14) | 88.9(3)    |
| <b>Compound 4</b> |           |                   |           |                   |            |
| O(3)-Cr(1)-O(4)   | 82.57(15) | O(15)-Cr(2)-O(16) | 82.61(15) | O(1)-Co(1)-O(2)   | 79.57(14)  |
| O(3)-Cr(1)-O(5)   | 99.70(18) | O(15)-Cr(2)-O(17) | 93.38(18) | O(1)-Co(1)-O(2W)  | 91.21(15)  |
| O(3)-Cr(1)-O(9)   | 90.80(16) | O(15)-Cr(2)-O(21) | 92.33(18) | O(1)-Co(1)-O(13)  | 99.98(14)  |
| O(3)-Cr(1)-O(10)  | 94.81(18) | O(15)-Cr(2)-O(22) | 87.93(15) | O(2)-Co(1)-O(14)  | 100.92(14) |
| O(4)-Cr(1)-O(5)   | 87.58(18) | O(16)-Cr(2)-O(17) | 95.77(18) | O(13)-Co(1)-O(14) | 79.53(14)  |
| O(4)-Cr(1)-O(6)   | 90.56(16) | O(16)-Cr(2)-O(18) | 91.56(17) | O(1W)-Co(1)-O(1)  | 89.17(18)  |
| O(4)-Cr(1)-O(10)  | 93.47(10) | O(16)-Cr(2)-O(22) | 90.11(18) | O(1W)-Co(1)-O(2)  | 86.87(16)  |
| O(5)-Cr(1)-O(6)   | 82.93(19) | O(17)-Cr(2)-O(18) | 82.7(2)   | O(1W)-Co(1)-O(13) | 92.22(16)  |
| O(5)-Cr(1)-O(9)   | 96.41(18) | O(17)-Cr(2)-O(21) | 91.73(19) | O(1W)-Co(1)-O(14) | 91.07(16)  |
| O(6)-Cr(1)-O(9)   | 96.50(18) | O(18)-Cr(2)-O(21) | 94.0(2)   | O(2W)-Co(1)-O(2)  | 93.27(16)  |
| O(6)-Cr(1)-O(10)  | 92.64(19) | O(18)-Cr(2)-O(22) | 96.66(19) | O(2W)-Co(1)-O(13) | 87.64(16)  |
| O(9)-Cr(1)-O(10)  | 83.06(17) | O(21)-Cr(2)-O(22) | 82.45(19) | O(2W)-Co(1)-O(14) | 88.55(17)  |

**Table 2S. hydrogen-bondings for Compound 1,  
(Bpyph)<sub>2</sub>{Mn(H<sub>2</sub>O)<sub>2</sub>[Fe(C<sub>2</sub>O<sub>4</sub>)<sub>3</sub>]<sub>2</sub>}·12.5H<sub>2</sub>O**

| D    | H   | A    | Symmetry code   | D(D-H) | d(H..A) | d(D..A)  | <DHA  |
|------|-----|------|-----------------|--------|---------|----------|-------|
| O1W  | H2  | N12  | 3-x, 0.5+y, 1-z | 0.96   | 1.83    | 2.780(3) | 169.6 |
| O1W  | H1  | O12W | .               | 0.71   | 2.04    | 2.748(4) | 169.2 |
| O2W  | H4  | N1   | -x, 0.5+y, 2-z  | 0.92   | 1.89    | 2.806(3) | 175.2 |
| O2W  | H3  | O5W  | .               | 0.88   | 1.89    | 2.754(4) | 167.6 |
| O4W  | H8  | O18  | .               | 0.93   | 2.05    | 2.971(4) | 170.8 |
| O4W  | H7  | O7   | 2-x, 0.5+y, 2-z | 0.89   | 2.10    | 2.910(4) | 152.3 |
| O6W  | H12 | O9   | 1-x, 0.5+y, 1-z | 0.85   | 2.05    | 2.884(3) | 168.3 |
| O6W  | H11 | O23  | .               | 0.88   | 1.92    | 2.789(4) | 167.6 |
| O12W | H24 | O5   | .               | 0.87   | 2.01    | 2.846(3) | 159.5 |
